# Supplementary material for: Activation of graphitic carbon nitride (g-C3N4) by alkaline hydrothermal treatment for photocatalytic NO oxidation in gas phase
Source: Royal Society of Chemistry journal article supplement (doi:10.1039/c3ta10472a), 2013-01-01
Supplement: c3ta10472a.pdf [file c3ta10472a.pdf]

# SUPPORTING INFORMATION FOR

## Activation of Graphitic Carbon Nitride (g-C<sub>3</sub>N<sub>4</sub>) by Alkaline Hydrothermal Treatment for Photocatalytic NO Oxidation in Gas Phase

Taizo Sano,\*<sup>a</sup> Sakiko Tsutsui,<sup>a</sup> Kazuhide Koike,<sup>a</sup> Tsutomu Hirakawa,  
<sup>a</sup> Yoshiyuki Teramoto,<sup>a</sup> Nobuaki Negishi<sup>a</sup> and Koji Takeuchi

<sup>a</sup> National Institute of Advanced Industrial Science and Technology (AIST),  
AIST Tsukuba West, 16-1 Onogawa, Tsukuba, Ibaraki 305-8569, Japan

\*Corresponding author. Tel: +81-29-861-8451, Fax: +81-29-861-8866,  
E-mail: sano-t@aist.go.jp

**Table S1** The effect of hydrothermal treatment.

| Solution        | Temperature (°C) | Relative surface area (m <sup>2</sup> /g) | NO removal percentage (%) | NO removal activity per unit surface area (μmol m <sup>-2</sup> h <sup>-1</sup> ) |
|-----------------|------------------|-------------------------------------------|---------------------------|-----------------------------------------------------------------------------------|
| none            | —                | 7.7                                       | 3.9                       | 0.064                                                                             |
| NaOH (0.1M)     | 90               | 50.0                                      | 35.6                      | 0.080                                                                             |
| NaOH (0.1M)     | 110              | 56.0                                      | 34.2                      | 0.068                                                                             |
| NaOH (0.1M)     | 130              | 53.7                                      | 37.6                      | 0.078                                                                             |
| NaOH (0.1M)     | 150              | 65.0                                      | 31.6                      | 0.054                                                                             |
| NaOH(0.01M)     | 150              | 14.9                                      | 10.5                      | 0.079                                                                             |
| NaOH(0.5M)      | 130              | 68.1                                      | 19.6                      | 0.032                                                                             |
| KOH(0.07M)      | 110              | 10.8                                      | 6.0                       | 0.062                                                                             |
| Deionized water | 150              | 13.1                                      | 4.0                       | 0.034                                                                             |

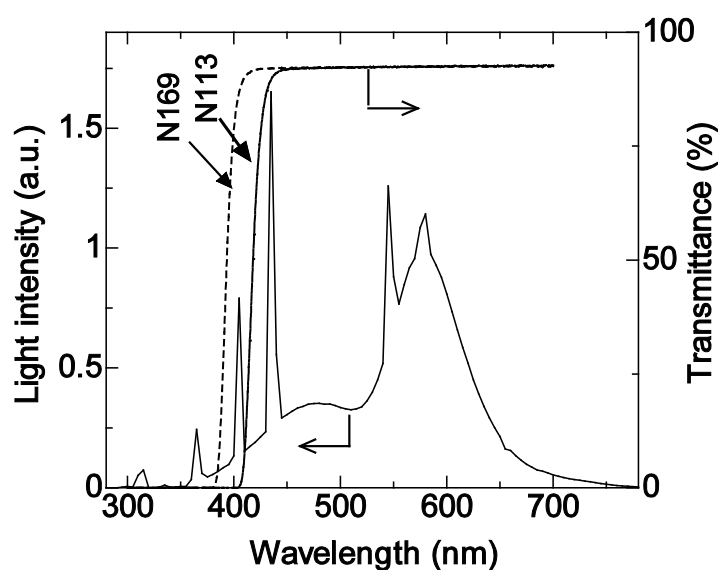

**Fig. S1** Spectrum of w-type fluorescent lamp used in the evaluation of NO<sub>x</sub> removal, and transmittance spectra of UV-cut filters (N169 and N113).

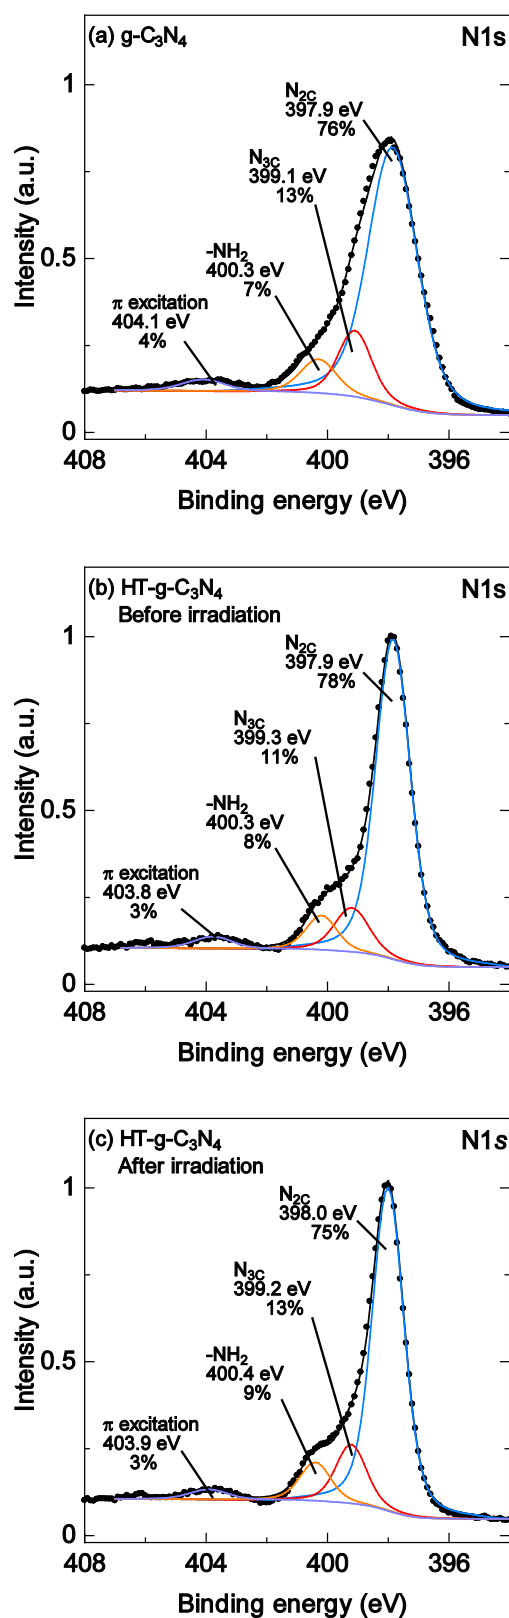

**Fig. S2** N1s XPS spectra of  $g-C_3N_4$  (a), HT- $g-C_3N_4$  obtained by alkaline hydrothermal treatment at 90 °C (b), and HT- $g-C_3N_4$  irradiated with UV light for 3 h (c). The peaks in the spectrum (a) were broadened because of charge-up. For the spectra (b) and (c), charge-up was reasonably inhibited.  $N_{2C}$  and  $N_{3C}$  denote two-coordinated and three-coordinated nitrogen atom of tri-s-triazine unit, respectively. It is supposed that a peak of the secondary amino group ( $-NH-$ ) connecting two tri-s-triazine unit is overlapped

with the peaks of  $N_{3c}$  and/or  $-NH_2$ .

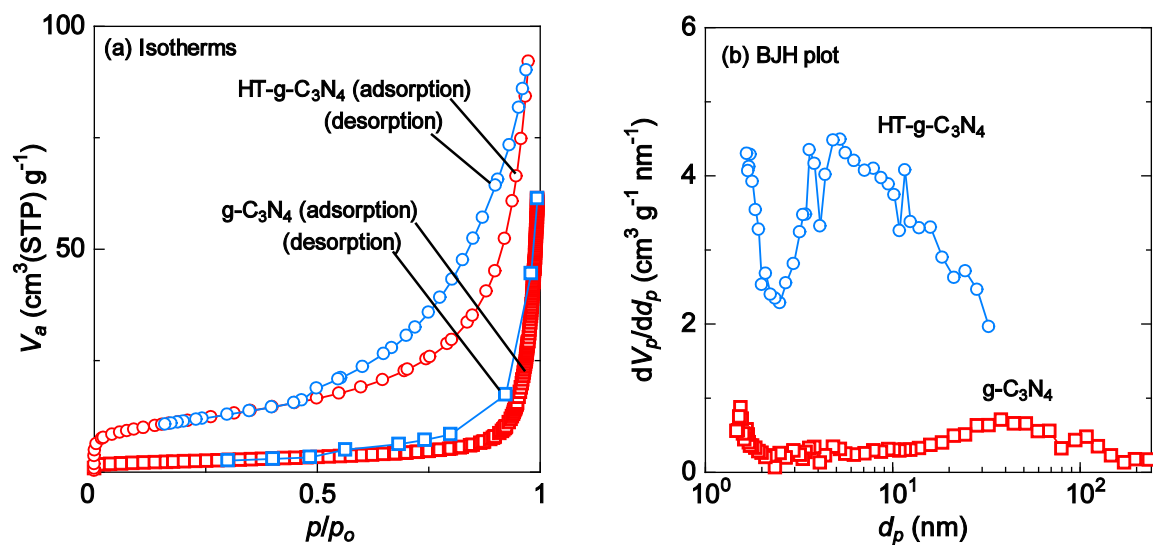

**Fig. S3** Nitrogen adsorption-desorption isotherms (a) and the corresponding pore size distribution curves (b) of  $g-C_3N_4$  and HT- $g-C_3N_4$  obtained at 90 °C. The pore size distribution was analyzed with BJH method.

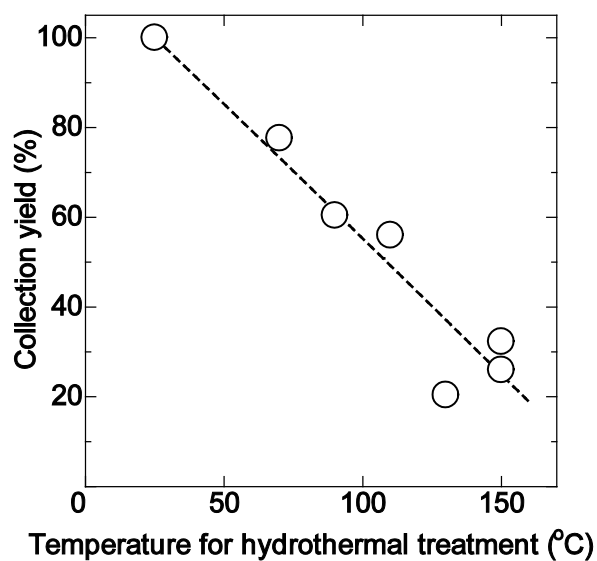

**Fig. S4** Dependence of collection yield of HT- $g-C_3N_4$  on temperature for hydrothermal treatment.

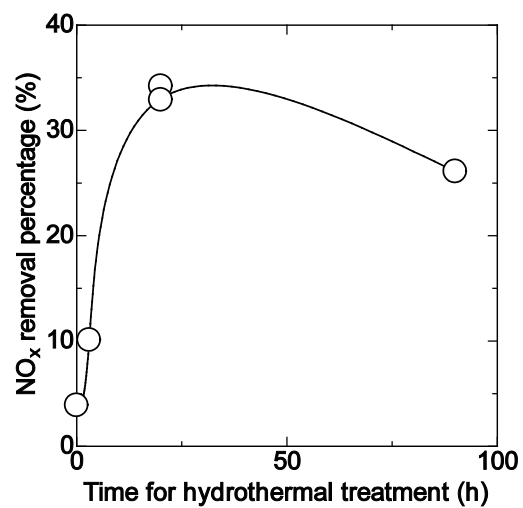

**Fig. S5** Dependence of NO<sub>x</sub> removal percentage on time for alkaline hydrothermal treatment. The treatment temperature was 110 °C.
